# Supplementary figures and images for: A system for imaging the regulatory noncoding Xist RNA in living mouse embryonic stem cells
Source: PubMed Central journal article supplement — Mol Biol Cell. 2011 Jul 15;22(14):2634–45. doi: 10.1091/mbc.E11-02-0146 (PMC3135487; doi:10.1091/mbc.e11-02-0146), 2011-07-15

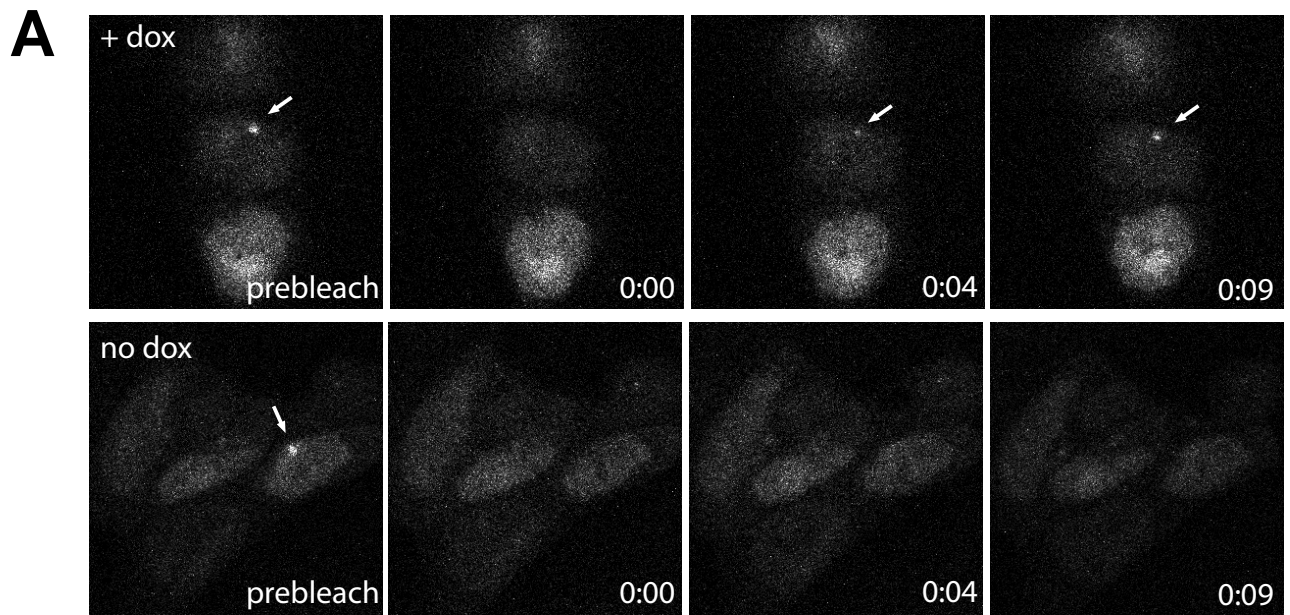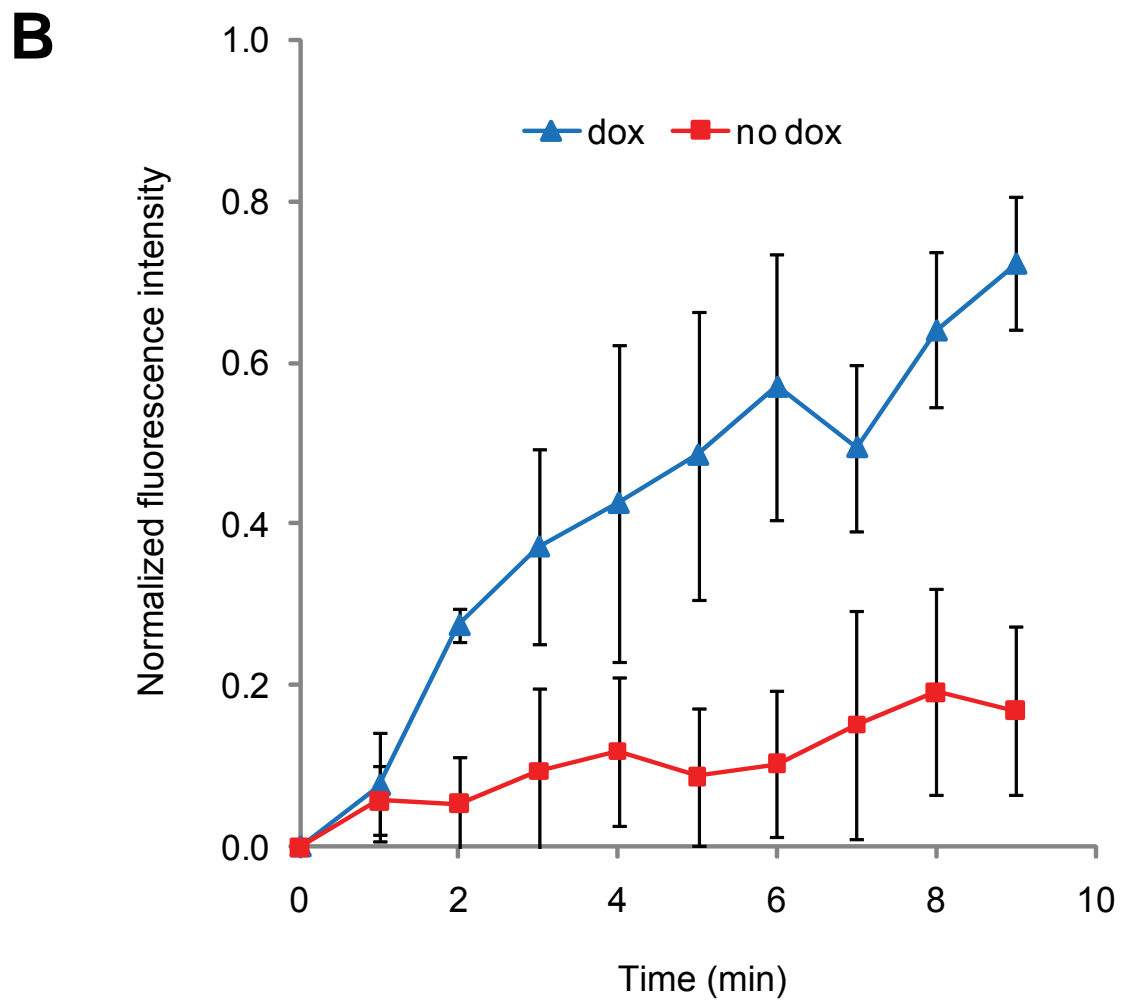

### FCS analysis

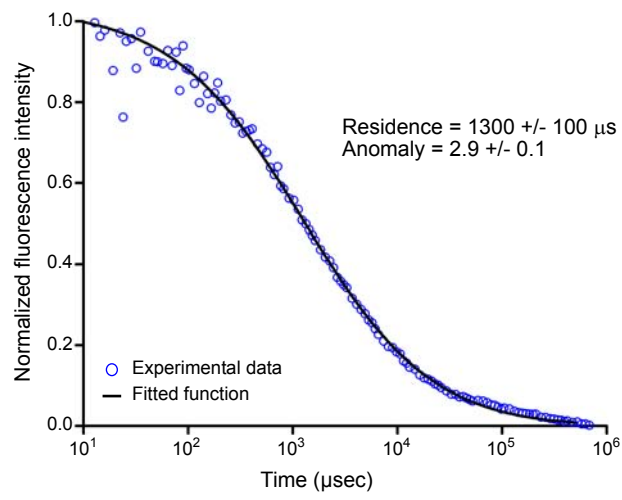

Supplement: E11-02-0146_1.pdf [file E11-02-0146_1.pdf]
